# Supplementary material for: New tetradentate N,O-hybrid phenanthroline-derived organophosphorus extractants for the separation and complexation of trivalent actinides and lanthanides
Source: Royal Society of Chemistry journal article supplement (doi:10.1039/d2qi01153k), 2022-01-01
Supplement: d2qi01153k1.pdf [file d2qi01153k1.pdf]

## Electronic supplementary information

of

**New Tetradentate N,O-Hybrid Phenanthroline-Derived Organophosphorus  
Extractants for the Separation and Complexation of Trivalent Actinides and  
Lanthanides**

Xiao Yang<sup>†</sup>, Shihui Wang<sup>†</sup>, Lei Xu<sup>§</sup>, Qiang Yan<sup>‡</sup>, Chao Xu<sup>‡</sup>, Petr Matveev<sup>#</sup>, Lecheng

Lei<sup>†</sup>, Chengliang Xiao<sup>†\*</sup>

<sup>†</sup>College of Chemical and Biological Engineering, Zhejiang University, Hangzhou 310027, China

<sup>‡</sup>Institute of Nuclear and New Energy Technology, Tsinghua University, Beijing 100084, China

<sup>§</sup>Institute of Nuclear-Agricultural Science, Zhejiang University, Hangzhou 310058, China

<sup>#</sup>Radiochemistry Division, Department of Chemistry, Lomonosov Moscow State University,  
Moscow 119991, Russian Federation

\*Email: [xiaoc@zju.edu.cn](mailto:xiaoc@zju.edu.cn) (Chengliang Xiao)

### Contents

|                                                                                                          |                     |
|----------------------------------------------------------------------------------------------------------|---------------------|
| <b>1. <sup>1</sup>H/<sup>31</sup>P NMR spectra and Maldi-Tof MS of ligands</b>                           | <b>Page S2-S3</b>   |
| <b>2. <sup>31</sup>P NMR titration spectra and peak positions of <sup>1</sup>H NMR spectra</b>           | <b>Page S4-S5</b>   |
| <b>3. UV-vis spectra titrated with La(NO<sub>3</sub>)<sub>3</sub> and Lu(NO<sub>3</sub>)<sub>3</sub></b> | <b>Page S6-S8</b>   |
| <b>4. Structure of Lu(L<sub>1</sub>)(NO<sub>3</sub>)<sub>3</sub></b>                                     | <b>Page S9</b>      |
| <b>5. Crystal data and structure refinement</b>                                                          | <b>Page S10-S11</b> |
| <b>6. Main bond distances and angles</b>                                                                 | <b>Page S12-</b>    |

S14

$^1\text{H}/^{31}\text{P}$  NMR spectra and Maldi-Tof MS of ligands.

$^1\text{H}$  NMR

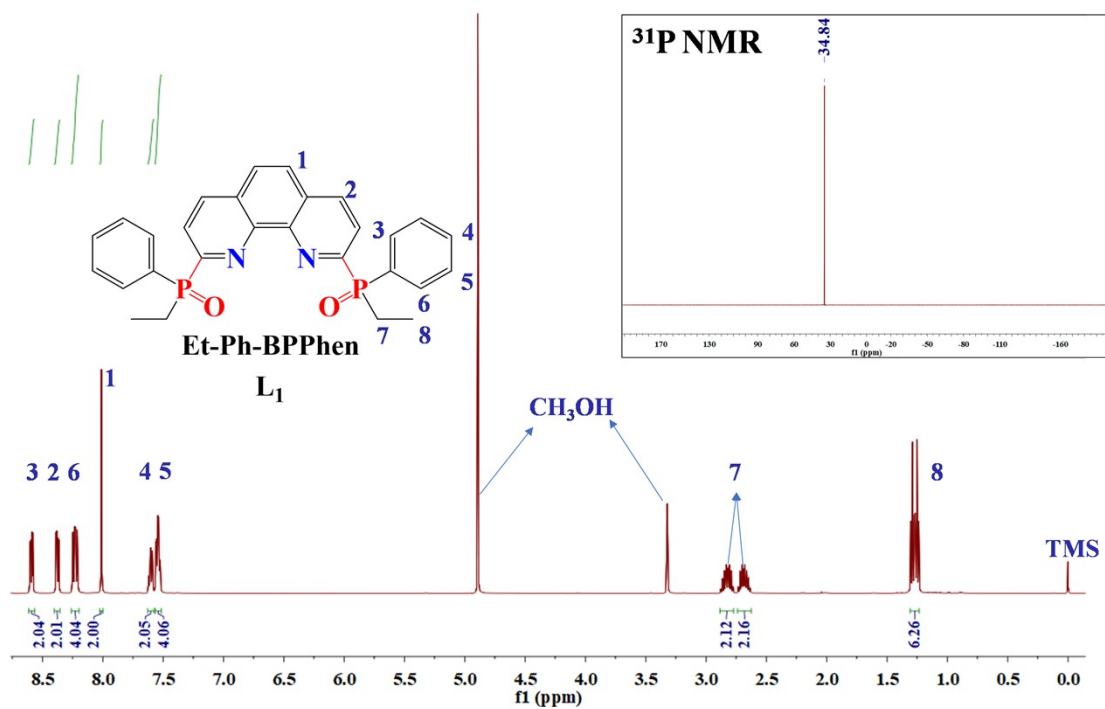

Figure S1.  $^1\text{H}$  NMR of Et-Ph-BPPhen ( $\text{L}_1$ ).

S2

### MALDI-TOF Mass Spectrum

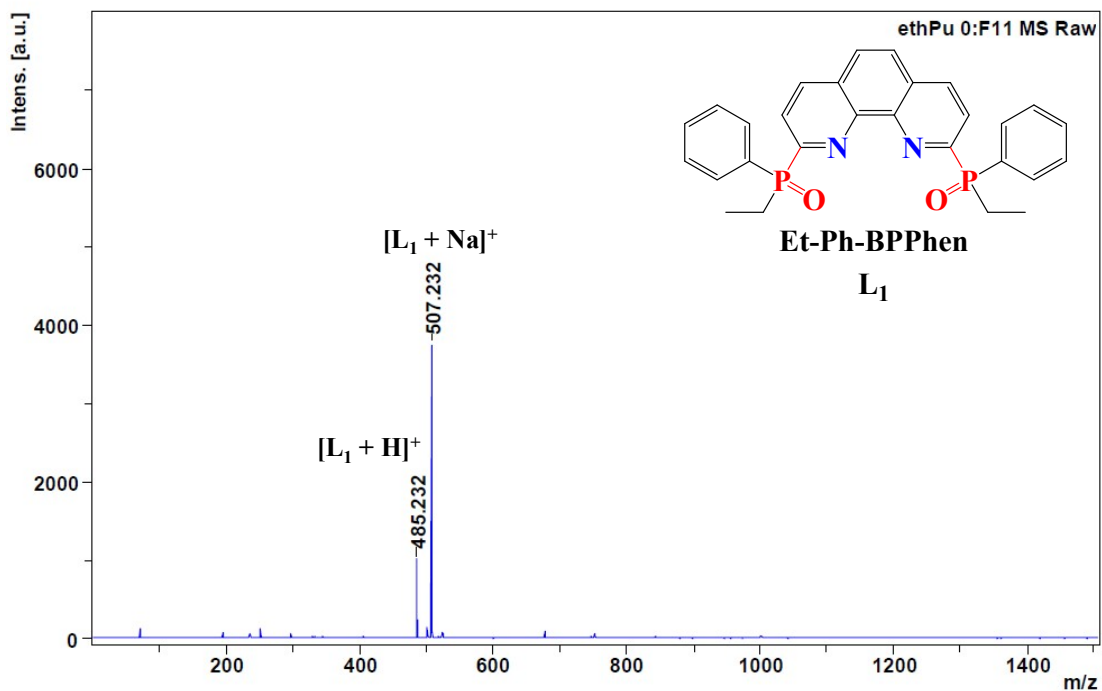

Figure S2. Maldi-Tof MS of Et-Ph-BPPPhen ( $L_1$ ).

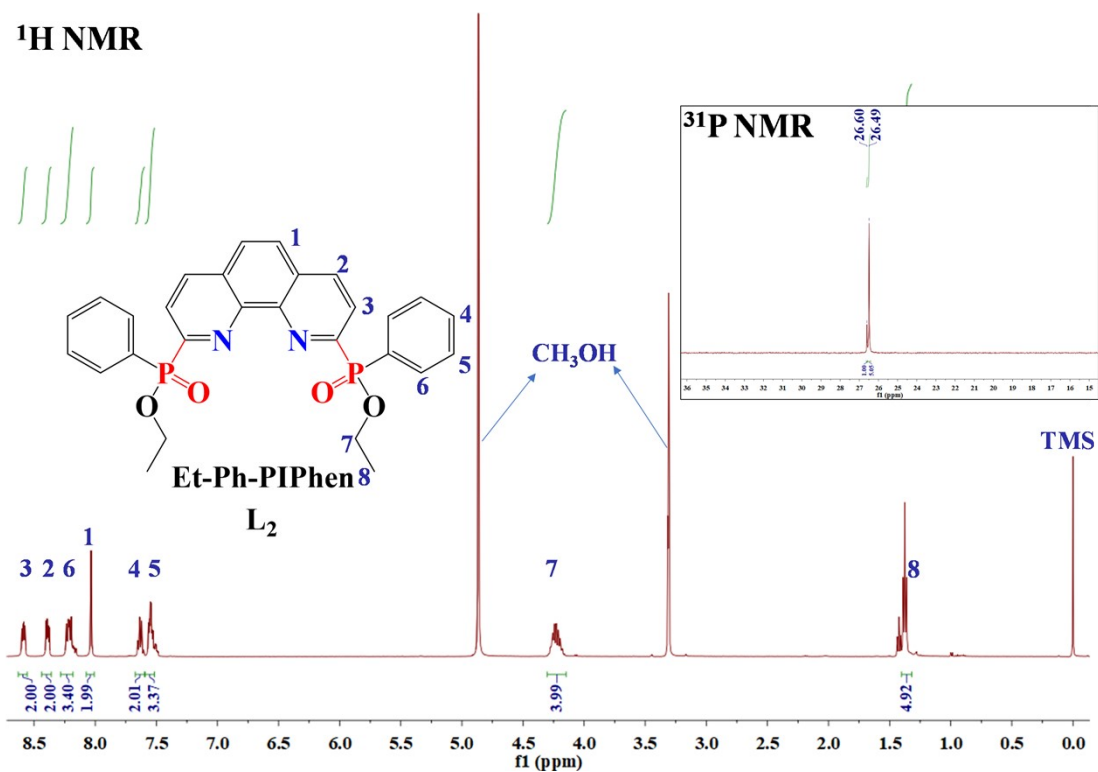

Figure S3.  $^1H$  and  $^{31}P$  NMR of Et-Ph-PIPPhen ( $L_2$ ).

### MALDI-TOF Mass Spectrum

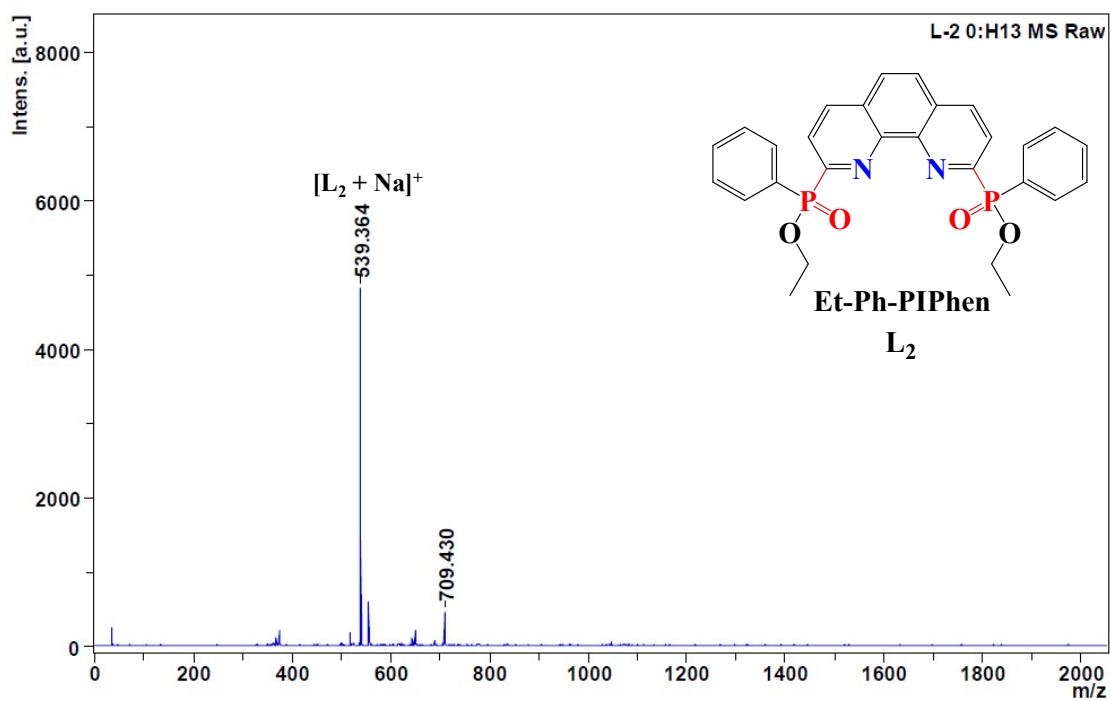

Figure S4. Maldi-Tof MS of Et-Ph-PIPhen (L<sub>2</sub>).

<sup>31</sup>P NMR titration spectra and peak positions of <sup>1</sup>H NMR spectra.

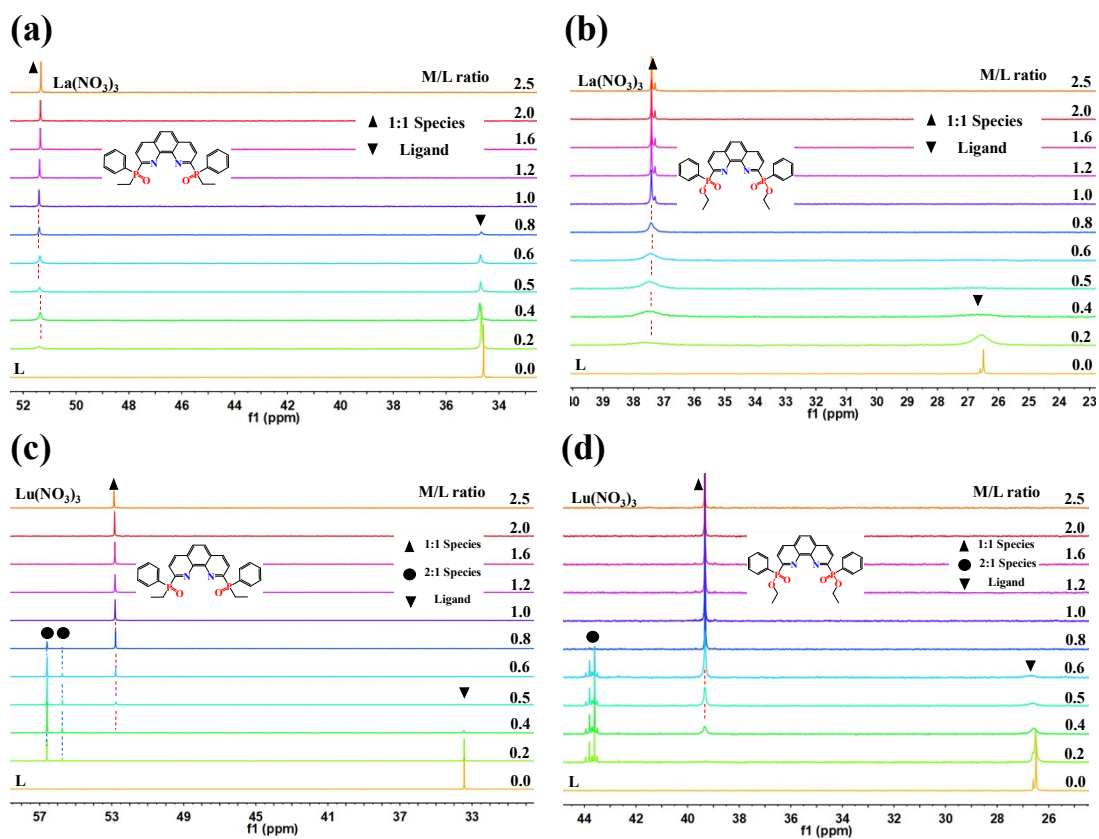

**Figure S5.** (a)  $^{31}\text{P}$  NMR spectra of  $\text{L}_1$  (10.0 mM) titrated with  $\text{La}(\text{NO}_3)_3$  (0 - 2.5 equiv.) in  $\text{CD}_3\text{OD}$ ; (b)  $^{31}\text{P}$  NMR spectra of  $\text{L}_2$  (10.0 mM) titrated with  $\text{La}(\text{NO}_3)_3$  (0 - 2.5 equiv.) in  $\text{CD}_3\text{OD}$ ; (c)  $^{31}\text{P}$  NMR spectra of  $\text{L}_1$  (10.0 mM) titrated with  $\text{Lu}(\text{NO}_3)_3$  (0 - 2.5 equiv.) in  $\text{CD}_3\text{OD}$ ; (d)  $^{31}\text{P}$  NMR spectra of  $\text{L}_2$  (10.0 mM) titrated with  $\text{Lu}(\text{NO}_3)_3$  (0 - 2.5 equiv.) in  $\text{CD}_3\text{OD}$ . M/L denotes the metal/ligand equivalents.

**Table S1** The peak positions of ligands and complexes in  $^1\text{H}$  NMR spectra

| Systems                   | Figures   | M/L ratio                                    |                                                 |                                                             |
|---------------------------|-----------|----------------------------------------------|-------------------------------------------------|-------------------------------------------------------------|
|                           |           | 0:1                                          | 1:1                                             | 1:2                                                         |
| La(III)-to-L <sub>1</sub> | <b>4a</b> | 8.56, 8.42, 8.25, 8.03,<br>7.58 and 7.51 ppm | 8.77, 8.23, 8.20,<br>8.10, 7.73 and<br>7.67 ppm | -                                                           |
| La(III)-to-L <sub>2</sub> | <b>4b</b> | 8.59, 8.39, 8.22, 8.03,<br>7.63 and 7.55 ppm | 8.76, 8.23, 8.20,<br>8.10, 7.73 and<br>7.68 ppm | -                                                           |
| Lu(III)-to-L <sub>1</sub> | <b>4c</b> | 8.64, 8.39, 8.21, 8.08,<br>7.60 and 7.54 ppm | 9.01, 8.54, 8.36,<br>8.14, 7.78 and<br>7.70 ppm | 9.42, 9.38, 9.08,<br>8.69, 7.44, 7.35,<br>7.24 and 7.09 ppm |
| Lu(III)-to-L <sub>2</sub> | <b>4d</b> | 8.59, 8.39, 8.22, 8.03,<br>7.63 and 7.55 ppm | 9.03, 8.53, 8.38,<br>8.19, 7.83 and<br>7.71 ppm | 9.06-9.55, 8.66 and<br>6.98-7.78 ppm                        |

UV-vis spectra titrated with  $\text{La}(\text{NO}_3)_3$  and  $\text{Lu}(\text{NO}_3)_3$ .

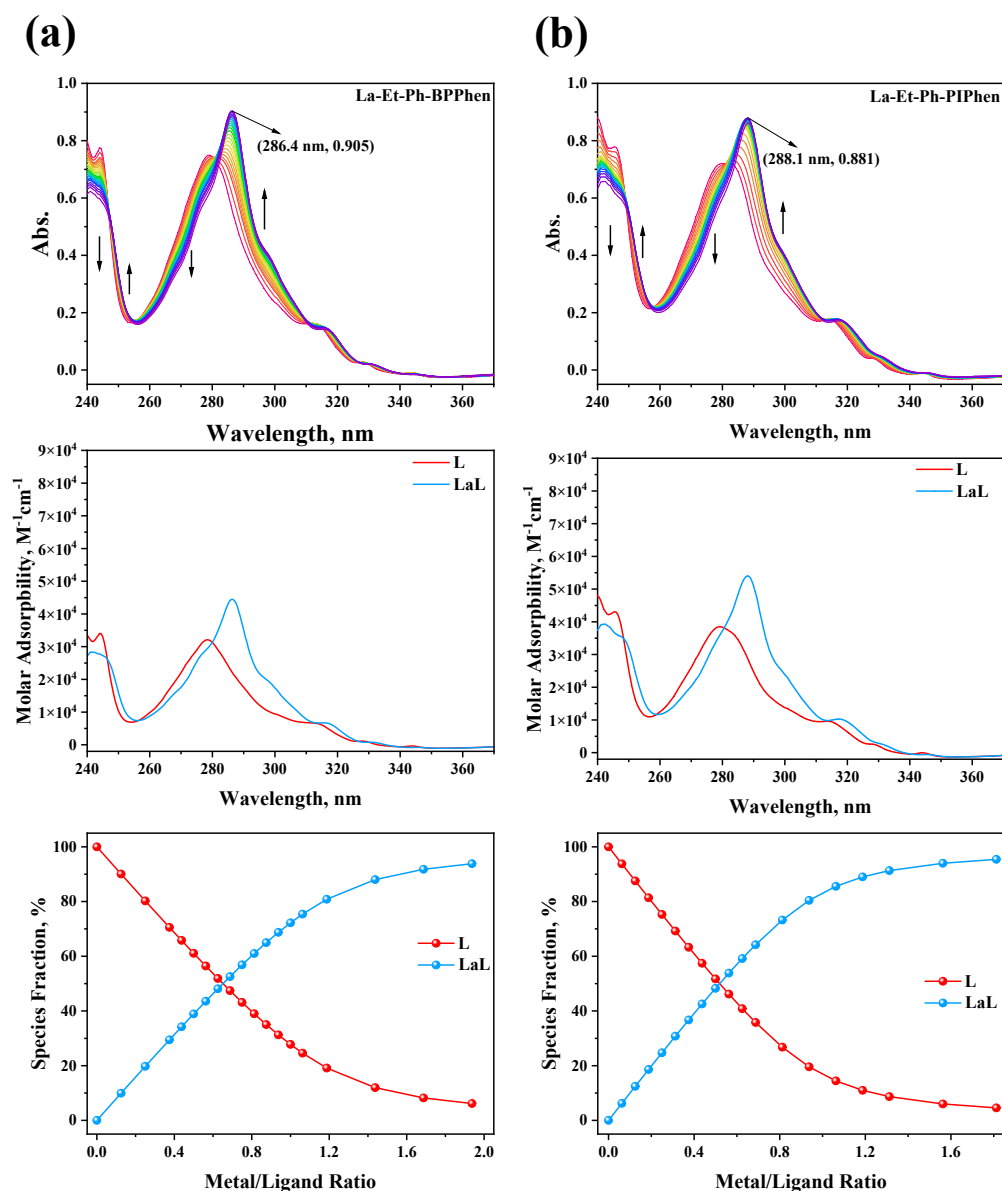

**Figure S6.** Spectra of ligands ( $\text{L}_1$  and  $\text{L}_2$ ) titrated with  $\text{La}(\text{NO}_3)_3$  in methanol solution ( $T = 298 \text{ K}$ ,  $I = 0.01 \text{ M Et}_4\text{NNO}_3$ ,  $V_0 = 2.00 \text{ mL}$ ). (a) Top: the normalized absorption spectra of  $\text{L}_1$  varied with the  $\text{La}(\text{NO}_3)_3$  concentration; Middle: the fitted molar absorptivity of the ligand and La(III) complexes; Bottom: the species fraction curves obtained during the titration process.  $C_L = 0.023 \text{ mM}$ ,  $C_{\text{La(III)}} = 0.24 \text{ mM}$ ,  $0.31 \text{ mL}$  titrant was added totally. (b) Top: the normalized absorption spectra of  $\text{L}_2$  varied with the  $\text{La}(\text{NO}_3)_3$  concentration; Middle: the fitted molar absorptivity of the

ligand and La(III) complexes; Bottom: the species fraction curves obtained during the titration

process.  $C_L = 0.019$  mM,  $C_{La(III)} = 0.24$  mM, 0.29 mL titrant was added totally.

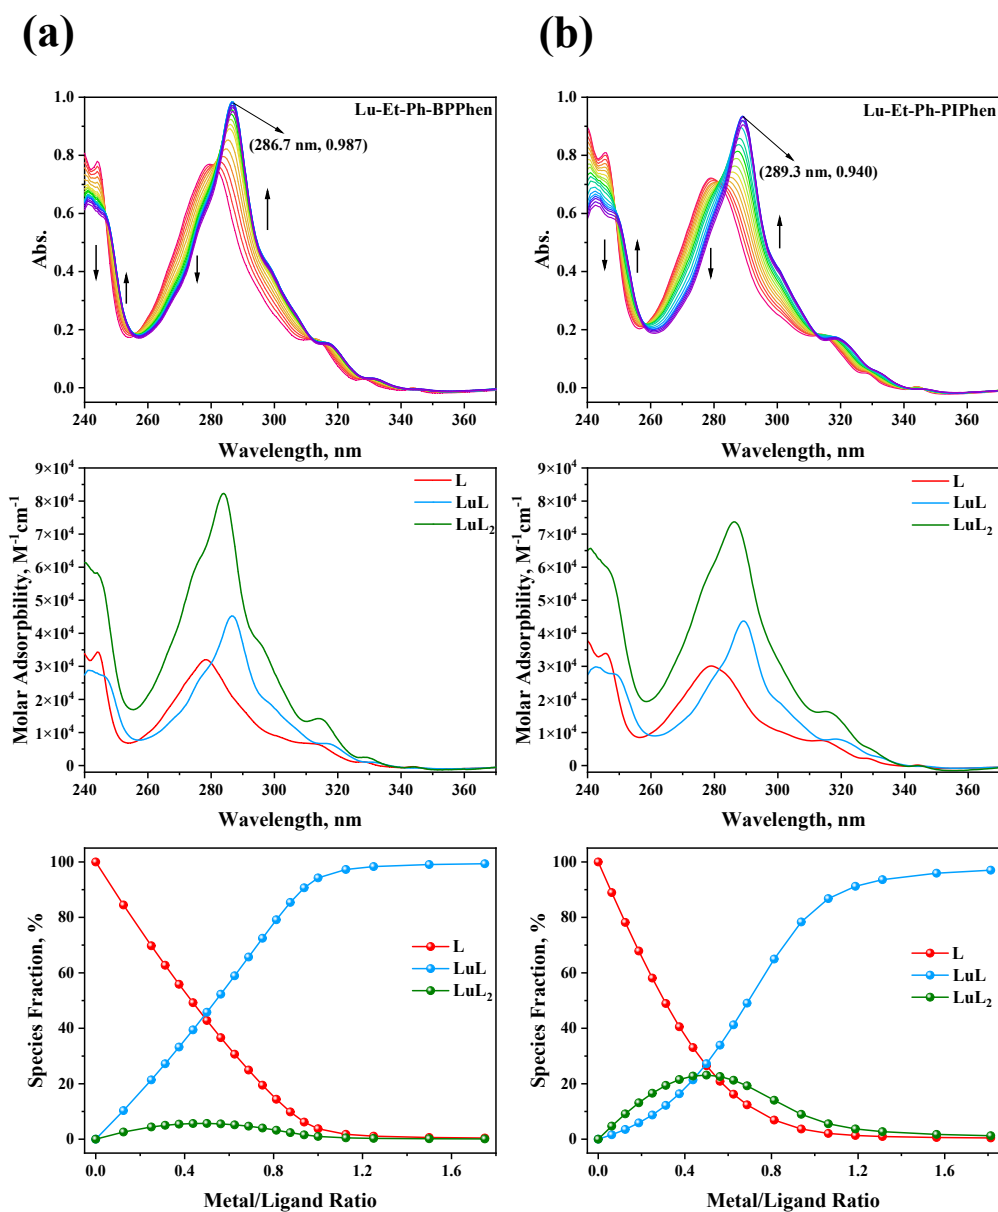

**Figure S7.** Spectra of ligands ( $L_1$  and  $L_2$ ) titrated with  $\text{Lu}(\text{NO}_3)_3$  in methanol solution ( $T = 298$  K,

$I = 0.01$  M  $\text{Et}_4\text{NNO}_3$ ,  $V_0 = 2.00$  mL). (a) Top: the normalized absorption spectra of  $L_1$  varied with

the  $\text{Lu}(\text{NO}_3)_3$  concentration; Middle: the fitted molar absorptivity of the ligand and Lu(III)

complexes; Bottom: the species fraction curves obtained during the titration process.  $C_L = 0.024$



mM,  $C_{\text{Lu(III)}} = 0.30$  mM, 0.31 mL titrant was added totally. (b) Top: the normalized absorption spectra of  $\text{L}_2$  varied with the  $\text{Lu}(\text{NO}_3)_3$  concentration; Middle: the fitted molar absorptivity of the ligand and Lu(III) complexes; Bottom: the species fraction curves obtained during the titration process.  $C_{\text{L}} = 0.024$  mM,  $C_{\text{Lu(III)}} = 0.30$  mM, 0.31 mL titrant was added totally.  $C_{\text{L}} = 0.024$  mM,

$C_{\text{Lu(III)}} = 0.30$  mM, 0.29 mL titrant was added totally.

## Structure of $\text{Lu}(\text{L}_1)(\text{NO}_3)_3$ .

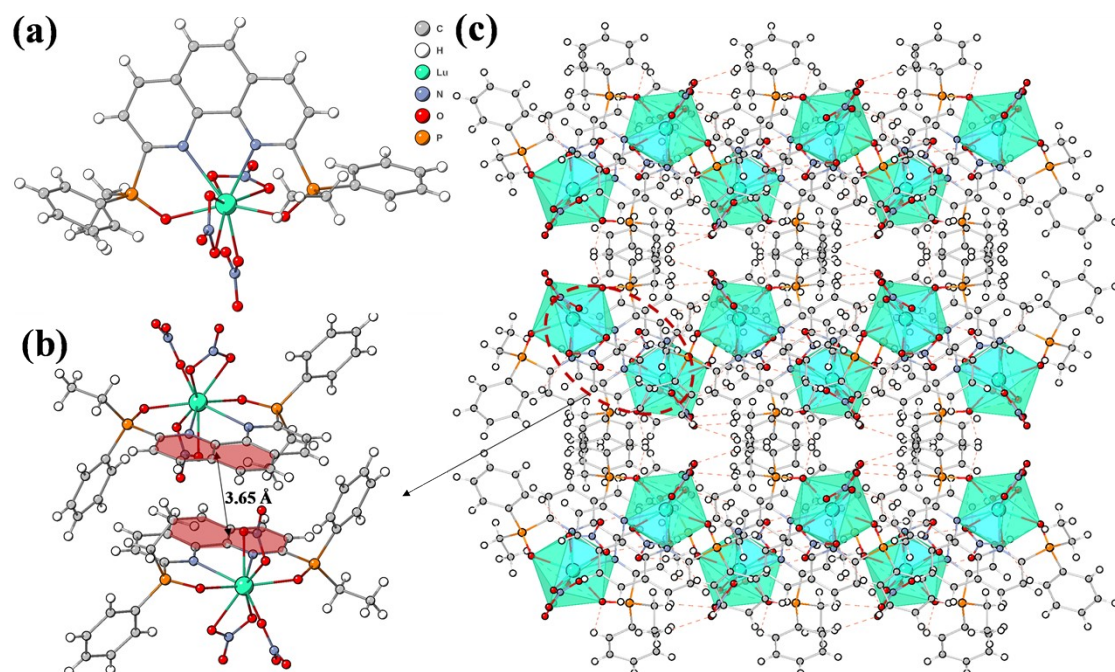

**Figure S8.** (a) Crystal structure, (b)  $\pi$ - $\pi$  stacking interaction and (c) crystal packing of  $\text{Lu}(\text{L}_1)(\text{NO}_3)_3$  viewed along with a-axis. Hydrogen bonds are presented by red dashed lines. The solvent molecules have been omitted for clarity. The Lu, O, N, P, C and H atoms are represented by light cyan, red, pastel blue, orange, light grey, and white colours, respectively.

## Crystal data and structure refinement.

**Table S2.** Crystal data and structure refinement for the crystals related to L<sub>1</sub>.

|                                           | La(L <sub>1</sub> )(NO <sub>3</sub> ) <sub>3</sub>                              | Eu(L <sub>1</sub> )(NO <sub>3</sub> ) <sub>3</sub>                              | Lu(L <sub>1</sub> )(NO <sub>3</sub> ) <sub>3</sub>                              |
|-------------------------------------------|---------------------------------------------------------------------------------|---------------------------------------------------------------------------------|---------------------------------------------------------------------------------|
| CCDC                                      | 2112088                                                                         | 2112094                                                                         | 2112093                                                                         |
| Empirical formula                         | C <sub>28</sub> H <sub>26</sub> LaN <sub>5</sub> O <sub>11</sub> P <sub>2</sub> | C <sub>28</sub> H <sub>26</sub> EuN <sub>5</sub> O <sub>11</sub> P <sub>2</sub> | C <sub>28</sub> H <sub>26</sub> LuN <sub>5</sub> O <sub>11</sub> P <sub>2</sub> |
| Formula weight                            | 809.39                                                                          | 822.44                                                                          | 845.45                                                                          |
| Temperature/K                             | 170                                                                             | 170                                                                             | 170                                                                             |
| Crystal system                            | orthorhombic                                                                    | orthorhombic                                                                    | orthorhombic                                                                    |
| Space group                               | Pbca                                                                            | Pbca                                                                            | Pbca                                                                            |
| a/Å                                       | 17.6729(5)                                                                      | 17.6662(5)                                                                      | 17.275(8)                                                                       |
| b/Å                                       | 17.7777(5)                                                                      | 17.5454(5)                                                                      | 17.814(8)                                                                       |
| c/Å                                       | 20.2305(6)                                                                      | 20.1869(6)                                                                      | 20.383(9)                                                                       |
| α/°                                       | 90                                                                              | 90                                                                              | 90                                                                              |
| β/°                                       | 90                                                                              | 90                                                                              | 90                                                                              |
| γ/°                                       | 90                                                                              | 90                                                                              | 90                                                                              |
| Volume/Å <sup>3</sup>                     | 6356.1(3)                                                                       | 6257.1(3)                                                                       | 6273(5)                                                                         |
| Z                                         | 8                                                                               | 8                                                                               | 8                                                                               |
| ρ <sub>calc</sub> g/cm <sup>3</sup>       | 1.692                                                                           | 1.746                                                                           | 1.79                                                                            |
| μ/mm <sup>-1</sup>                        | 1.512                                                                           | 2.175                                                                           | 3.318                                                                           |
| F(000)                                    | 3232                                                                            | 3280                                                                            | 3344                                                                            |
| Crystal size/mm <sup>3</sup>              | 0.12 × 0.1 × 0.02                                                               | 0.25 × 0.13 × 0.1                                                               | 0.04 × 0.02 × 0.02                                                              |
| Radiation                                 | MoKα (λ = 0.71073)                                                              | MoKα (λ = 0.71073)                                                              | MoKα (λ = 0.71073)                                                              |
| 2θ range for data collection/°            | 3.822 to 60.078                                                                 | 3.844 to 72.202                                                                 | 4.572 to 55.598                                                                 |
| Index ranges                              | -24 ≤ h ≤ 20, -25 ≤ k ≤ 25, -28 ≤ l ≤ 28                                        | -29 ≤ h ≤ 24, -27 ≤ k ≤ 26, -32 ≤ l ≤ 32                                        | -22 ≤ h ≤ 22, -22 ≤ k ≤ 22, -25 ≤ l ≤ 23                                        |
| Reflections collected                     | 131263                                                                          | 169270                                                                          | 47883                                                                           |
| Independent reflections                   | 9295 [R <sub>int</sub> = 0.0687, R <sub>sigma</sub> = 0.0270]                   | 13957 [R <sub>int</sub> = 0.0411, R <sub>sigma</sub> = 0.0254]                  | 6809 [R <sub>int</sub> = 0.0768, R <sub>sigma</sub> = 0.0471]                   |
| Data/restraints/parameters                | 9295/0/426                                                                      | 13957/0/426                                                                     | 6809/0/426                                                                      |
| Goodness-of-fit on F <sup>2</sup>         | 1.043                                                                           | 1.031                                                                           | 1.04                                                                            |
| Final R indexes [I ≥ 2σ (I)]              | R <sub>1</sub> = 0.0289, wR <sub>2</sub> = 0.0596                               | R <sub>1</sub> = 0.0257, wR <sub>2</sub> = 0.0489                               | R <sub>1</sub> = 0.0364, wR <sub>2</sub> = 0.0750                               |
| Final R indexes [all data]                | R <sub>1</sub> = 0.0422, wR <sub>2</sub> = 0.0662                               | R <sub>1</sub> = 0.0439, wR <sub>2</sub> = 0.0537                               | R <sub>1</sub> = 0.0580, wR <sub>2</sub> = 0.0850                               |
| Largest diff. peak/hole/e Å <sup>-3</sup> | 0.43/-0.76                                                                      | 0.59/-0.95                                                                      | 1.57/-0.92                                                                      |

**Table S3.** Crystal data and structure refinement for the crystals related to **L<sub>2</sub>**.

|                                           | (La) <sub>2</sub> (L <sub>2</sub> ) <sub>2</sub> (NO <sub>3</sub> ) <sub>6</sub> ·CH <sub>3</sub> OH | Eu(L <sub>2</sub> )(NO <sub>3</sub> ) <sub>3</sub>                              |
|-------------------------------------------|------------------------------------------------------------------------------------------------------|---------------------------------------------------------------------------------|
| CCDC                                      | 2112095                                                                                              | 2124871                                                                         |
| Empirical formula                         | C <sub>58</sub> H <sub>60</sub> La <sub>2</sub> N <sub>10</sub> O <sub>28</sub> P <sub>4</sub>       | C <sub>28</sub> H <sub>26</sub> EuN <sub>5</sub> O <sub>13</sub> P <sub>2</sub> |
| Formula weight                            | 1746.86                                                                                              | 854.44                                                                          |
| Temperature/K                             | 170                                                                                                  | 170                                                                             |
| Crystal system                            | monoclinic                                                                                           | orthorhombic                                                                    |
| Space group                               | P2 <sub>1</sub> /c                                                                                   | Pna21                                                                           |
| a/Å                                       | 16.500(6)                                                                                            | 16.516(5)                                                                       |
| b/Å                                       | 25.533(7)                                                                                            | 14.612(5)                                                                       |
| c/Å                                       | 17.385(9)                                                                                            | 13.254(4)                                                                       |
| α/°                                       | 90                                                                                                   | 90                                                                              |
| β/°                                       | 95.61(2)                                                                                             | 90                                                                              |
| γ/°                                       | 90                                                                                                   | 90                                                                              |
| Volume/Å <sup>3</sup>                     | 7289(5)                                                                                              | 3198.5(17)                                                                      |
| Z                                         | 4                                                                                                    | 4                                                                               |
| ρ <sub>calc</sub> /cm <sup>3</sup>        | 1.592                                                                                                | 1.774                                                                           |
| μ/mm <sup>-1</sup>                        | 1.331                                                                                                | 2.136                                                                           |
| F(000)                                    | 3504                                                                                                 | 1704                                                                            |
| Crystal size/mm <sup>3</sup>              | 0.39 × 0.26 × 0.16                                                                                   | 0.09 × 0.03 × 0.02                                                              |
| Radiation                                 | MoKα (λ = 0.71073)                                                                                   | MoKα (λ = 0.71073)                                                              |
| 2θ range for data collection/°            | 3.922 to 61.088                                                                                      | 4.826 to 54.336                                                                 |
| Index ranges                              | -23 ≤ h ≤ 23, -36 ≤ k ≤ 34, -24 ≤ l ≤ 24                                                             | -21 ≤ h ≤ 21, -18 ≤ k ≤ 18, -17 ≤ l ≤ 17                                        |
| Reflections collected                     | 146615                                                                                               | 105406                                                                          |
| Independent reflections                   | 22284 [R <sub>int</sub> = 0.0564, R <sub>sigma</sub> = 0.0382]                                       | 7094 [R <sub>int</sub> = 0.0610, R <sub>sigma</sub> = 0.0244]                   |
| Data/restraints/parameters                | 22284/167/997                                                                                        | 7094/1/444                                                                      |
| Goodness-of-fit on F <sup>2</sup>         | 1.03                                                                                                 | 1.054                                                                           |
| Final R indexes [I ≥ 2σ (I)]              | R <sub>1</sub> = 0.0440, wR <sub>2</sub> = 0.1034                                                    | R <sub>1</sub> = 0.0308, wR <sub>2</sub> = 0.0788                               |
| Final R indexes [all data]                | R <sub>1</sub> = 0.0724, wR <sub>2</sub> = 0.1179                                                    | R <sub>1</sub> = 0.0342, wR <sub>2</sub> = 0.0814                               |
| Largest diff. peak/hole/e Å <sup>-3</sup> | 1.61/-1.19                                                                                           | 1.31/-0.85                                                                      |

## Main bond distances and angles.

**Table S4.** Main bond distances and angles for the La(L<sub>1</sub>)(NO<sub>3</sub>)<sub>3</sub> complex.

| <b>Bond/Angle</b> | <b>Å/°</b> |
|-------------------|------------|
| La-O1             | 2.4357(15) |
| La-O2             | 2.4852(15) |
| La-O3             | 2.5925(17) |
| La-O4             | 2.5988(19) |
| La-O6             | 2.6770(18) |
| La-O7             | 2.5941(16) |
| La-O9             | 2.6259(17) |
| La-O10            | 2.6029(17) |
| La-N1             | 2.7947(17) |
| La-N2             | 2.7722(18) |
| O1-La-O2          | 158.69(5)  |

**Table S5.** Main bond distances and angles for the Eu(L<sub>1</sub>)(NO<sub>3</sub>)<sub>3</sub> complex.

| <b>Bond/Angle</b> | <b>Å/°</b> |
|-------------------|------------|
| Eu-O1             | 2.3465(11) |
| Eu-O2             | 2.3971(10) |
| Eu-O3             | 2.4973(11) |
| Eu-O4             | 2.4952(12) |
| Eu-O6             | 2.6569(13) |
| Eu-O7             | 2.4869(11) |
| Eu-O9             | 2.5415(12) |
| Eu-O10            | 2.4921(11) |
| Eu-N1             | 2.7150(11) |
| Eu-N2             | 2.6844(12) |
| O1-Eu-O2          | 155.41(4)  |

**Table S6.** Main bond distances and angles for the Lu(L<sub>1</sub>)(NO<sub>3</sub>)<sub>3</sub> complex.

| <b>Bond/Angle</b> | <b>Å/°</b> |
|-------------------|------------|
| Lu-O1             | 2.372(3)   |
| Lu-O2             | 2.301(3)   |
| Lu-O3             | 2.370(4)   |
| Lu-O4             | 2.421(4)   |
| Lu-O6             | 2.270(3)   |
| Lu-O9             | 2.482(4)   |
| Lu-O10            | 2.314(3)   |
| Lu-N1             | 2.551(4)   |
| Lu-N2             | 2.639(4)   |
| O1-Lu-O2          | 152.29(12) |

**Table S7.** Main bond distances and angles for the (La)<sub>2</sub>(L<sub>2</sub>)<sub>2</sub>(NO<sub>3</sub>)<sub>6</sub>·CH<sub>3</sub>OH complex.

| <b>Bond/Angle</b> | <b>Å/°</b> | <b>Bond/Angle</b> | <b>Å/°</b> |
|-------------------|------------|-------------------|------------|
| La1-O1            | 2.516(2)   | La2-O15           | 2.469(3)   |
| La1-O3            | 2.523(2)   | La2-O17           | 2.482(2)   |
| La1-O5            | 2.730(3)   | La2-O22           | 2.678(3)   |
| La1-O6            | 2.612(3)   | La2-O23           | 2.586(3)   |
| La1-O8            | 2.628(3)   | La2-O25           | 2.620(5)   |
| La1-O9            | 2.705(3)   | La2-O26           | 2.628(4)   |
| La1-O11           | 2.743(3)   | La2-O19           | 2.531(14)  |
| La1-O12           | 2.640(3)   | La2-O19A          | 2.553(5)   |
| La1-O14           | 2.550(3)   | La2-O21A          | 2.575(4)   |
| La1-N1            | 2.787(3)   | La2-N6            | 2.774(2)   |
| La1-N2            | 2.790(3)   | La2-N7            | 2.768(3)   |
| O1-La1-O3         | 168.71(7)  | O15-La2-O17       | 149.49(10) |

**Table S8.** Main bond distances and angles for the Eu(L<sub>2</sub>)(NO<sub>3</sub>)<sub>3</sub> complex.

| <b>Bond/Angle</b> | <b>Å/°</b> |
|-------------------|------------|
| Eu1-O1            | 2.355(4)   |
| Eu1-O3            | 2.361(4)   |
| Eu1-O5            | 2.539(5)   |
| Eu1-O6            | 2.498(6)   |
| Eu1-O8            | 2.496(6)   |
| Eu1-O9            | 2.567(9)   |
| Eu1-O11           | 2.513(5)   |
| Eu1-O12           | 2.468(5)   |
| Eu1-N1            | 2.672(6)   |
| Eu1-N2            | 2.668(5)   |
| O1-La1-O3         | 154.29(15) |
